# Supplementary material for: Alternative Splicing in the Differentiation of Human Embryonic Stem Cells into Cardiac Precursors
Source: PubMed Central journal article supplement (PMC2764345; doi:10.1371/journal.pcbi.1000553), 2009-11-06
Supplement: pcbi.1000553.s003.pdf [file pcbi.1000553.s003.pdf]

**Confirmed**

| <b>Primers</b>            | <b>Sequence</b>            |
|---------------------------|----------------------------|
| L-CSDE1_2-4_Flank         | AAAGTGCAATATTTGAGTACTACTGC |
| R-CSDE1_2-4_Flank         | TTCACCAGTTTAACAGCAATGG     |
| L-MADD_25-27_Flank        | CCAGCGAGTCTATCTCTATGAGG    |
| R-MADD_25-27_Flank        | GAGGTTGTGCAGAAGTGTGG       |
| L-NF1_48-50_Flank         | TGACCTCACTTGCAACTTCC       |
| R-NF1_48-50_Flank         | AAGTGCAGCATTACAACATGG      |
| L-NUMB_7-10_Flank         | TGGCACCACAATCTCCTACC       |
| R-NUMB_7-10_Flank         | TCCCTTGAAAGGTGATGC         |
| L-SAPS2_1-4_Flank         | CCACAAATGTTTTCTGTTTTGC     |
| R-SAPS2_1-4_Flank         | AGCAGCTTCTGGTTCTGAGC       |
| L-CDC42_5-7_Int5'         | TGCCAAGAACAACAGAAGC        |
| R-CDC42_5-7_Int5'         | GAGGCTTTC AACAGGATGG       |
| L-CDC42_5-7_Junc3'        | AAGAAAAGTGGGTGCCTGAG       |
| R-CDC42_5-7_Junc3'        | ACATTCTTTAGGCCTTCTGTG      |
| L-CDC42BPA_33-35_Flank    | ACATGGGTCCTGGAGATGG        |
| R-CDC42BPA_33-35_Flank    | ATCACTTCCTTGGTCCATGC       |
| L-CLK1_7-8_Flank          | GACTGGATCATATCAGAAAGATGG   |
| R-CLK1_7-8_Flank          | TCGTCCATCATATGTTGCACTACC   |
| L-EWSR1_14-18_Flank       | ACTGGCAGTGTCCCAATCC        |
| R-EWSR1_14-18_Flank       | CCCATCTGTTCCATCAAAGG       |
| L-HDAC9_2-4_Flank         | TTGGCTCAGCAAAGAATGC        |
| R-HDAC9_2-4_Flank         | GCCGTGTCAAGTTCTCATGC       |
| R-HIF3A_6-8_Flank         | CAGACGATACTCTCCGACTGG      |
| L-HIF3A_6-8_Flank         | ACCTGGAAGGTGCTGAACTG       |
| L-LRRFIP1_2-10_Flank      | GCGAGATCCGCATGAAGG         |
| R-LRRFIP1_2-10_Flank      | TTCCTTGATTTCCCTGATGG       |
| L-NAV2_15-18_Flank        | TGTCAGAACTAACAGTGTGAAGACC  |
| R-NAV2_15-18_Flank        | GGATCATACTGCCCATCAGC       |
| L-OGDH_4-6_Flank          | AGCCCAACGTGGACAAGC         |
| R-OGDH_4-6_Flank          | GATGATCTCCCGCAGAGG         |
| L-WNK2_23-27_Flank        | GCAGGCAAGCTGCTAAATCC       |
| R-WNK2_23-27_Flank        | CCATGTCTTGCAGCTTCTGG       |
| L-FER_2-4_Flank           | ACACCTCATCATGGACACG        |
| R-FER_2-4_Flank           | GGCCATAAATTTCTTTACTGTTCC   |
| L-ABI2_2-4_Flank          | TCTCCTCCAGTGTCTTTCC        |
| R-ABI2_2-4_Flank          | ACTCAACCACAGCAGCTTCC       |
| L-ANXA7_5-7_Flank         | TCAGTATCCTGGAGGACAACC      |
| R-ANXA7_5-7_Flank         | AAACCCTTCATTGCCTTACG       |
| R-ASPH_6_cterm1           | TCCTTCCTGGATAGGTCTGC       |
| R-ASPH_7_cterm2           | TTGTTGTGGTTCTCCTGTGG       |
| L-ATP2A2_20-23_Internal5' | CCTCTATGTCTGAACCCTTGC      |
| R-ATP2A2_20-23_Internal5' | CACCAGGGGCATTATGAGC        |
| L-ATP2A2_20-23_Junction5' | CCTGGAACCTGCAATACTGG       |
| R-ATP2A2_20-23_Junction5' | CCTCTTGCAGCAAAGAAACC       |
| L-KIF13A_37-39_Flank      | AAAAGGATAGCCCTGGAAGC       |
| R-KIF13A_37-39_Flank      | GGACACTTCTTTCTCCAAGACC     |
| L-NEDD4_1-3_Flank         | AAGAGACAGCAACAGAGATTGC     |

|                         |                         |
|-------------------------|-------------------------|
| R-NEDD4_1-5_Flank       | TGAGGGGTTGGTCTTTTCC     |
| L-NEDD4_Const5'         | TTGCAGCAACAACAAGAACC    |
| R-NEDD4_Const5'         | GGCCTGGTTGCTATACATGG    |
| L-PCBP4_3-6_Flank       | GAAGGGCGAGACTGTAAAGC    |
| R-PCBP4_3-6_Flank       | AGCCTTCCAATCAGTGAGC     |
| L-SPTBN1_31-34_Int5'    | GAGCACGAAGGTTTCAGAGG    |
| R-SPTBN1_31-34_Int5'    | ACCCAGAGGATTTGGAAAGG    |
| L-SPTBN1_31-34_Junc5'   | AGGGATCTCCACGGGATG      |
| R-SPTBN1_31-34_Junc5'   | ACTCGTGTTTCCGATTGAGG    |
| L-STAU1_2-4_Flank       | TTCGTCCCTTCTTCCTCTCC    |
| R-STAU1_2-4_Flank       | GCAGCCTGTCTTGTCTTTCC    |
| L-UBE4B_6-8_Flank       | AACAAGCCCCATGTTCTGC     |
| R-UBE4B_6-8_Flank       | TCAGAAGCTGGCTGACTGC     |
| L-FYN_6_Internal5'      | TTATCCGCGAGAGTGAAACC    |
| R-FYN_8_Mx1-Incl        | GACAGATCGGTAAGCCTTGG    |
| R-FYN_9_Mx1-Incl        | TTCTCCAGACACAACGAACG    |
| L-PKM2_8-10_Excl-Incl   | TGGAGAGCATGATCAAGAAGC   |
| R-PKM2_8-9_Internal5'   | GGTCTGTGGAGTGACTTGAGG   |
| R-PKM2_8-10_Excl        | CCACTGCAGCACTTGAAGG     |
| L-TCF3_16               | CTCGGAGGAGGAGAAGAAGG    |
| R-TCF3_16-18_Mx1-Incl   | GATGAGCAGCTTGGTCTGC     |
| R-TCF3_16-19_Mx2-Incl   | GCTCCAAGTTCAGGATGACC    |
| L-ADD3_13-15_Flank      | CAATCGAACGTAAACAACAAGG  |
| R-ADD3_13-15_Flank      | TCAGGTGACAGGACTTCTTCG   |
| L-CAPZB_8-10_Flank      | AAAACAAAGGATATCGTCAATGG |
| R-CAPZB_8-10_Flank      | TGATGCAGCTGTTATGTGACC   |
| L-DNM1L_2-4_Flank       | GAAGATAAACGGAAAACAACAGG |
| R-DNM1L_2-4_Flank       | ATCACCTACAGGCACCTTGG    |
| L-HISPPD2A_26_Flank     | AGCCATGGCAAAAAGCTACC    |
| R-HISPPD2A_27-29_Flank  | TGTGCATGGAATCAAAGAGG    |
| L-MARK3_20-24_Flank     | CGAACCGCAACATATAATGG    |
| R-MARK3_20-24_Flank     | GCTCATAGTCGCAGTTATTGG   |
| L-SLK_12-14_Flank       | GCTGAAGAACCGAAAGAAGG    |
| R-SLK_12-14_Flank       | GATCTTTAAGCTGCTGTTTGAGC |
| L-TJP1_19-21_Flank      | AGACTCCCCTGGATTTAAGC    |
| R-TJP1_19-21_Flank      | TCCGTATAGCTTGAGGACTCG   |
| L-SEPT6_9-11_Internal5' | GCTGCACGAGAAGTTTGACC    |
| R-SEPT6_9-11_Internal5' | CAGCATGCAGCAAACAGC      |
| L-SEPT6_9-11_Const5'    | CGGCACTATGAGCTGTATCG    |
| R-SEPT6_9-11_Const5'    | TGGTGCAGTTTCTTCAGACG    |
| L-VCL_21-23_Flank       | ATGATGAAGCTCGCAAATGG    |
| R-VCL_21-23_Flank       | GTGCTTATGTTGGGATTTCG    |
| L-VCL_6-8_Flank         | ACCTCTTGGGATGAAGATGC    |
| R-VCL_6-8_Flank         | GCTGCATTTTCCACTTTTGC    |
| L-VCL_6-8_Internal5'    | AAACCAAGGCATAGAGGAAGC   |
| R-VCL_6-8_Internal5'    | GACAGGTGCCAATCAAACC     |
| L-VPS39_2-4_Flank       | TTGTGGGAACCAAACAAGG     |
| R-VPS39_2-4_Flank       | AACAGTGATGCTCCCTTTGC    |
| L-C6orf134_10-12_cterm1 | CTGGGAAACTCACCAGAACG    |

|                           |                          |
|---------------------------|--------------------------|
| R-C6orf134_10-12_cterm1   | AGGATGCAATGGAAGAGTGG     |
| L-C6orf134_1-12_cterm2    | AGCAGAGGGAGACATCAAGC     |
| R-C6orf134_1-12_cterm2    | AGCTTTGGGCTACCAGACC      |
| L-DERP6/C17orf81_9_Flank  | AAGCCAGAGATAGCCTGATCC    |
| R-DERP6/C17orf81_11_Flank | CTCCATAGACAAGGGGAACC     |
| L-LEFTY_4-6_Int5'         | CATGATCGTCAGCATCAAGG     |
| R-LEFTY_4-6_Int5'         | CAGAGCATTGTCCATCAGC      |
| L-LEFTY_1_Const5'         | AGCCTTCTCAAGGGACAGC      |
| R-LEFTY_1_Const5'         | ACCAGCTCCTCCATGTCC       |
| L-ASPH_4_cterm            | CTATGATGCTGATGGTGATGG    |
| L-MAFB_6-8_miR-130a       | CACTGCACTGAACCAACTGC     |
| R-MAFB_6-8_miR-130a       | TTTTTGTCAGTGCAACTTAAATCC |
| L-MAFB_4-8_Const5'        | CATCACCATCATCACCAAGC     |
| R-MAFB_4-8_Const5'        | CTGCTGGACGCGTTTATACC     |

### Not-Confirmed

| Primers              | Sequence                  |
|----------------------|---------------------------|
| L-KIF21A_11-13_Flank | GAAGTTGAAAAGAAAAGAAAAGAGG |
| R-KIF21A_11-13_Flank | CCCCATCAATGTCATCTTCC      |
| L-CTSL1_2-5_Flank    | TCACAGTTTAGAGGCACAGTGG    |
| R-CTSL1_2-5_Flank    | CTTCATCAGGGCCTTCTCC       |
| L-CTSL1_2-5_Flank    | TCACAGTTTAGAGGCACAGTGG    |
| R-CTSL1_2-5_Flank    | CTTCATCAGGGCCTTCTCC       |
| L-TRAF6_1-3_Flank    | AGCAGAGAAGGCGGAAGC        |
| R-TRAF6_1-3_Flank    | AAATGAGCTGGAGAGGTTCC      |
| L-PPP3CB_3-5_Flank   | GGCGATTATGTGGACAGAGG      |
| R-PPP3CB_3-5_Flank   | GGTTTAAAAGTGCAGCAAGAGG    |
| L-SF3B1_4_Excl_form  | GAGCGTCTTGATCCTTTTGC      |
| R-SF3B1_6_Excl_form  | CAGCTGTTTGATCCCAACG       |
| L-GAD45B_4-6_Flank   | GGAAGAGGAGGAGGAGAAGG      |
| R-GAD45B_4-6_Flank   | TGGGTACAGAGCAACTTCAGC     |
